# Supplementary material for: Integrative proteomics reveals principles of dynamic phosphosignaling networks in human erythropoiesis
Source: PubMed Central journal article supplement (PMC7706838; doi:10.15252/msb.20209813), 2020-12-01
Supplement: MSB-16-e9813-s001.pdf [file MSB-16-e9813-s001.pdf]

## Expanded View Figures

**Figure EV1. Establishing stage-specific proteomes of erythropoiesis.**

- A FACS gating/sorting regime to enrich for CD235a<sup>+</sup> progenitor population.
- B Characterization of the differentiation stages in culture. May–Grünwald–Giemsa staining of erythroid cells is shown. Scale bar, 20  $\mu$ m.
- C Coefficient variations (CVs) of four biological replicates for each protein were calculated in all stages to show the reproducibility of our system. Dashed line shows the cutoff line of 20% CV.
- D Cumulative protein abundance and dynamic range in five differentiation stages. Hemoglobin subunits (HBB, HBA1, HBE1 and, HBG1) are labeled as progenitor (yellow) and Ortho (orange) stages.
- E Estimated median copy numbers of histones per cell across all measured stages.

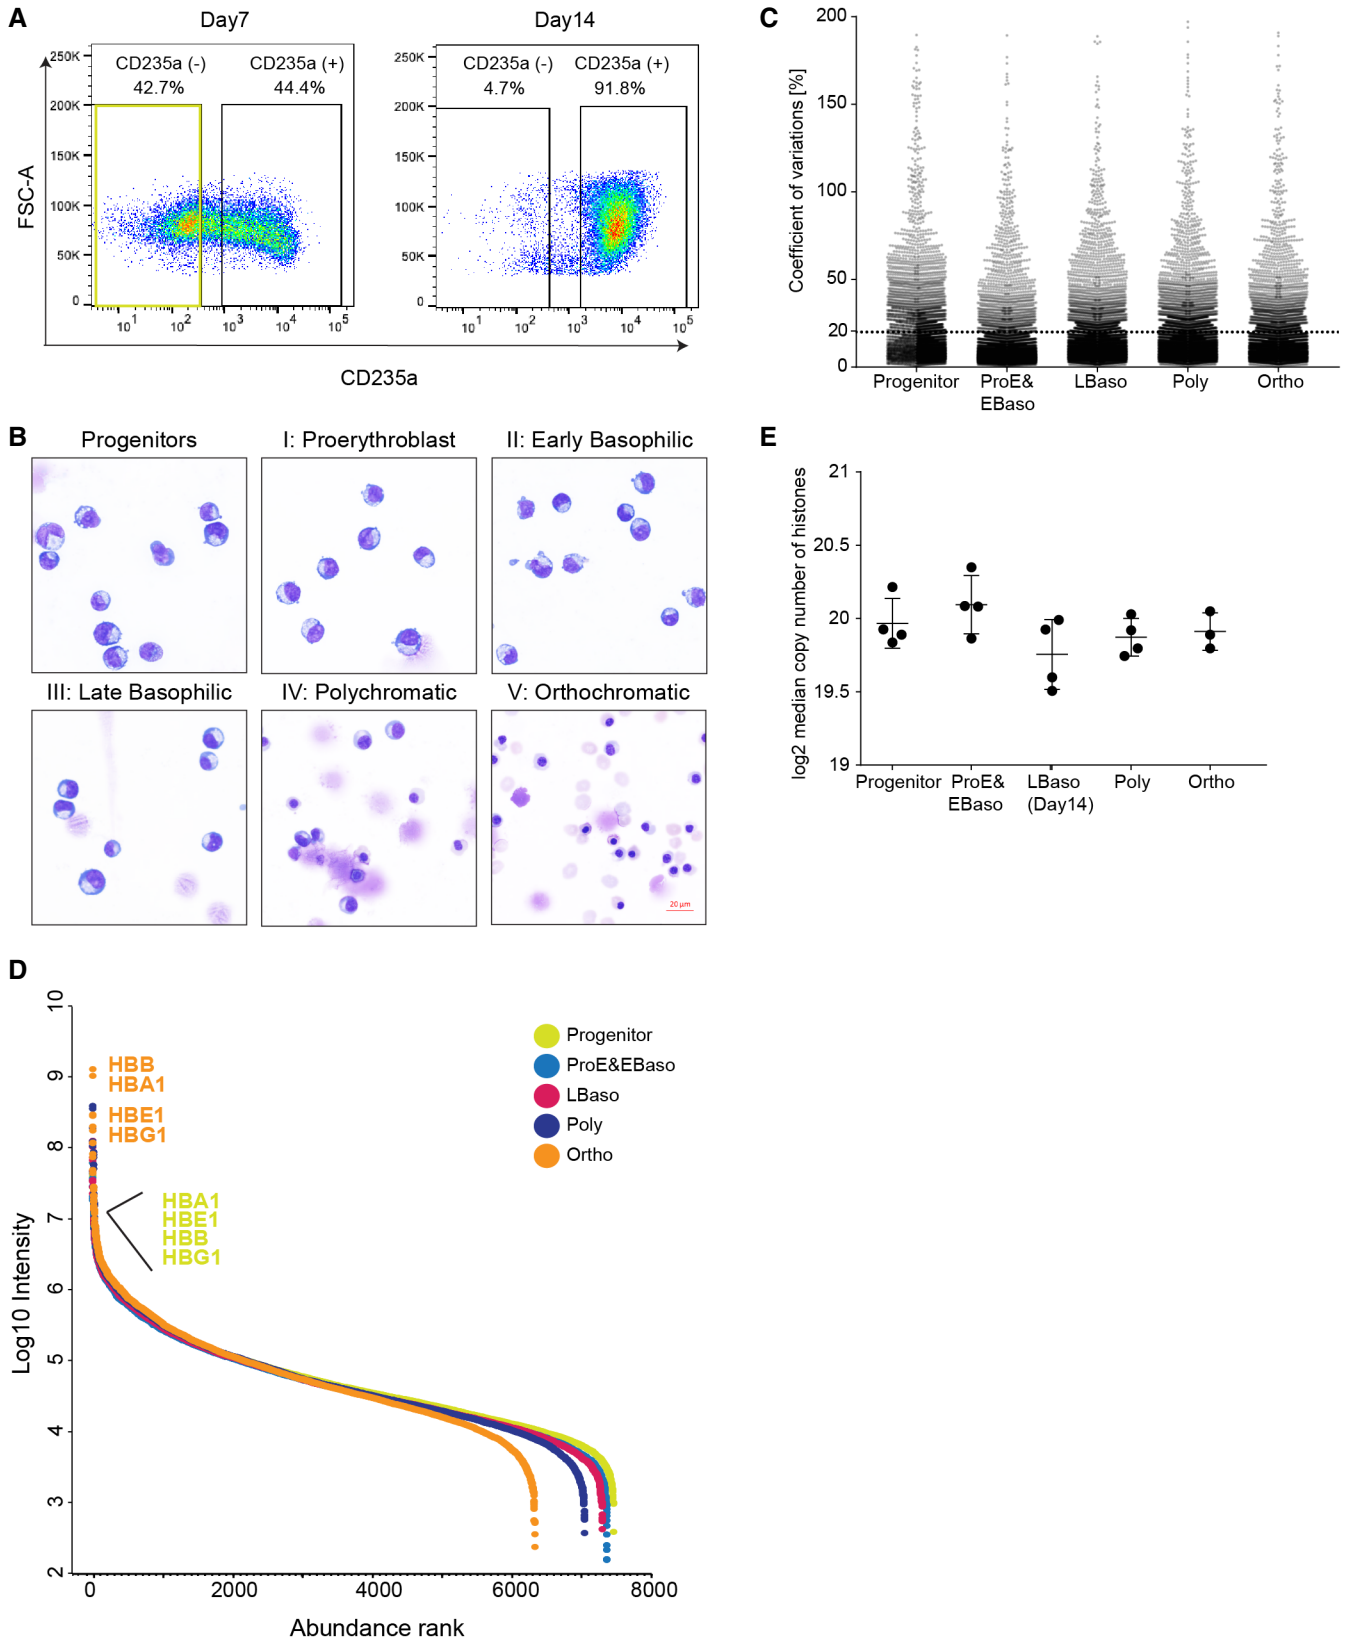

Figure EV1.

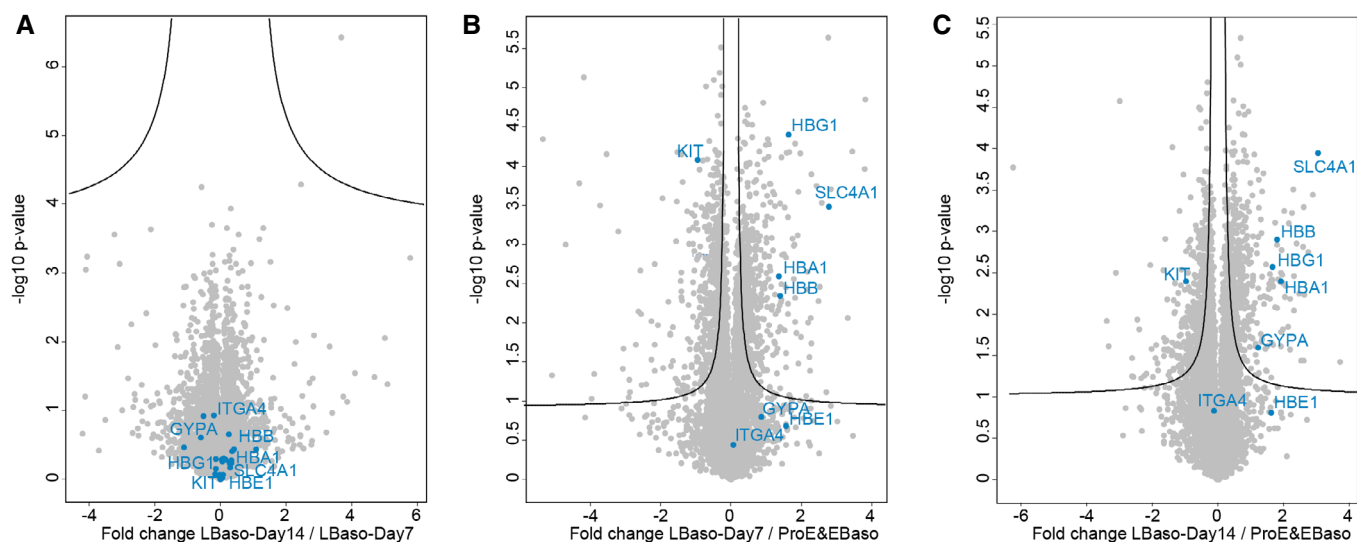

**Figure EV2. Comparison of differentiation stage-specific proteomes of human erythropoiesis.**

A–C Volcano plots of the ( $-\log_{10}$ )  $P$ -values versus the  $\log_2$  protein abundance differences between LBaso day 7 and LBaso day 14 (left), LBaso day 7 and ProE-EBaso (middle), and LBaso day 14 and ProE-EBaso (right) with the significance lines ( $FDR < 0.05$  and  $S_0 = 0.1$ ). Selected marker proteins are labeled in blue.

**Figure EV3. Gene Ontology (GO) enrichment analysis of significant proteome clusters.**

Gene Ontology (GO) enrichment analysis of six clusters of significant proteome shown in Figure 2A was performed using Fisher's exact test. 2% threshold was applied to Benjamini–Hochberg FDR to determine the significance.

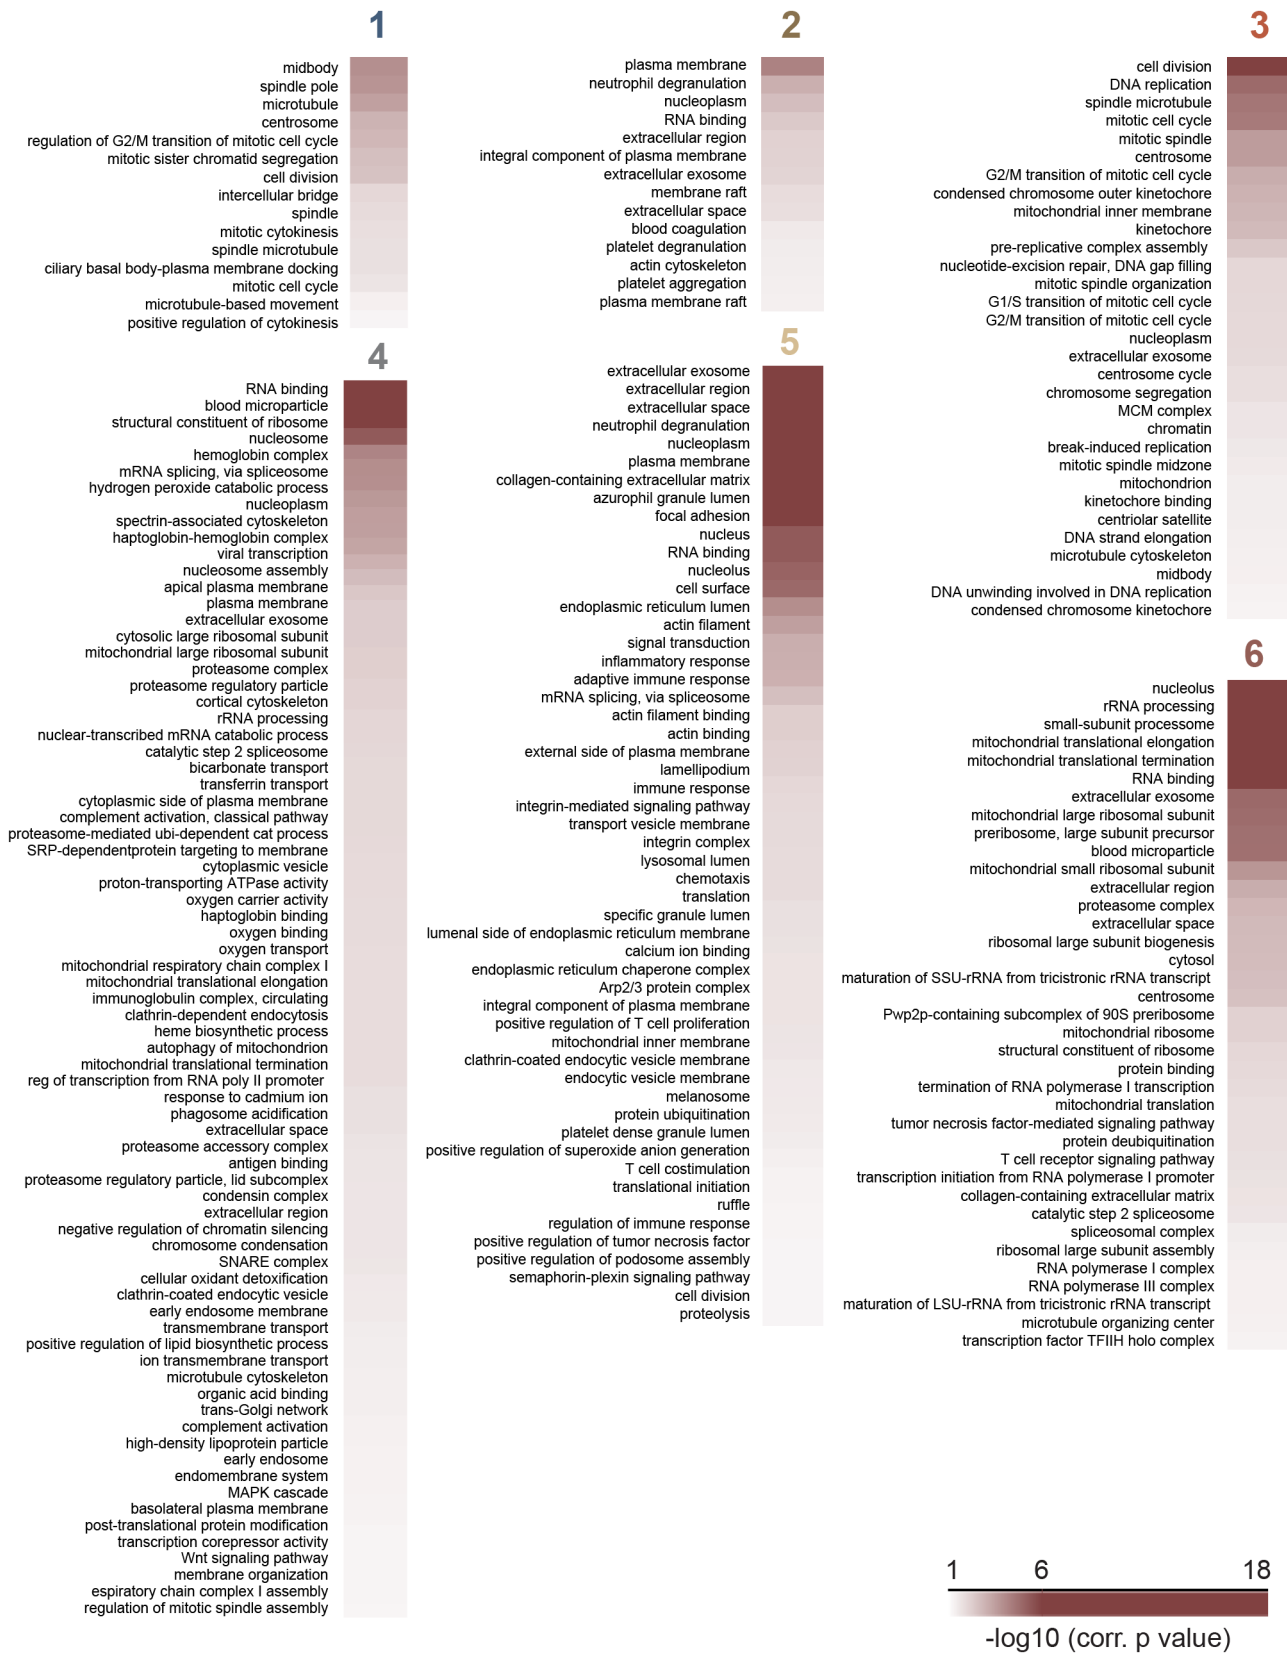

Figure EV3.

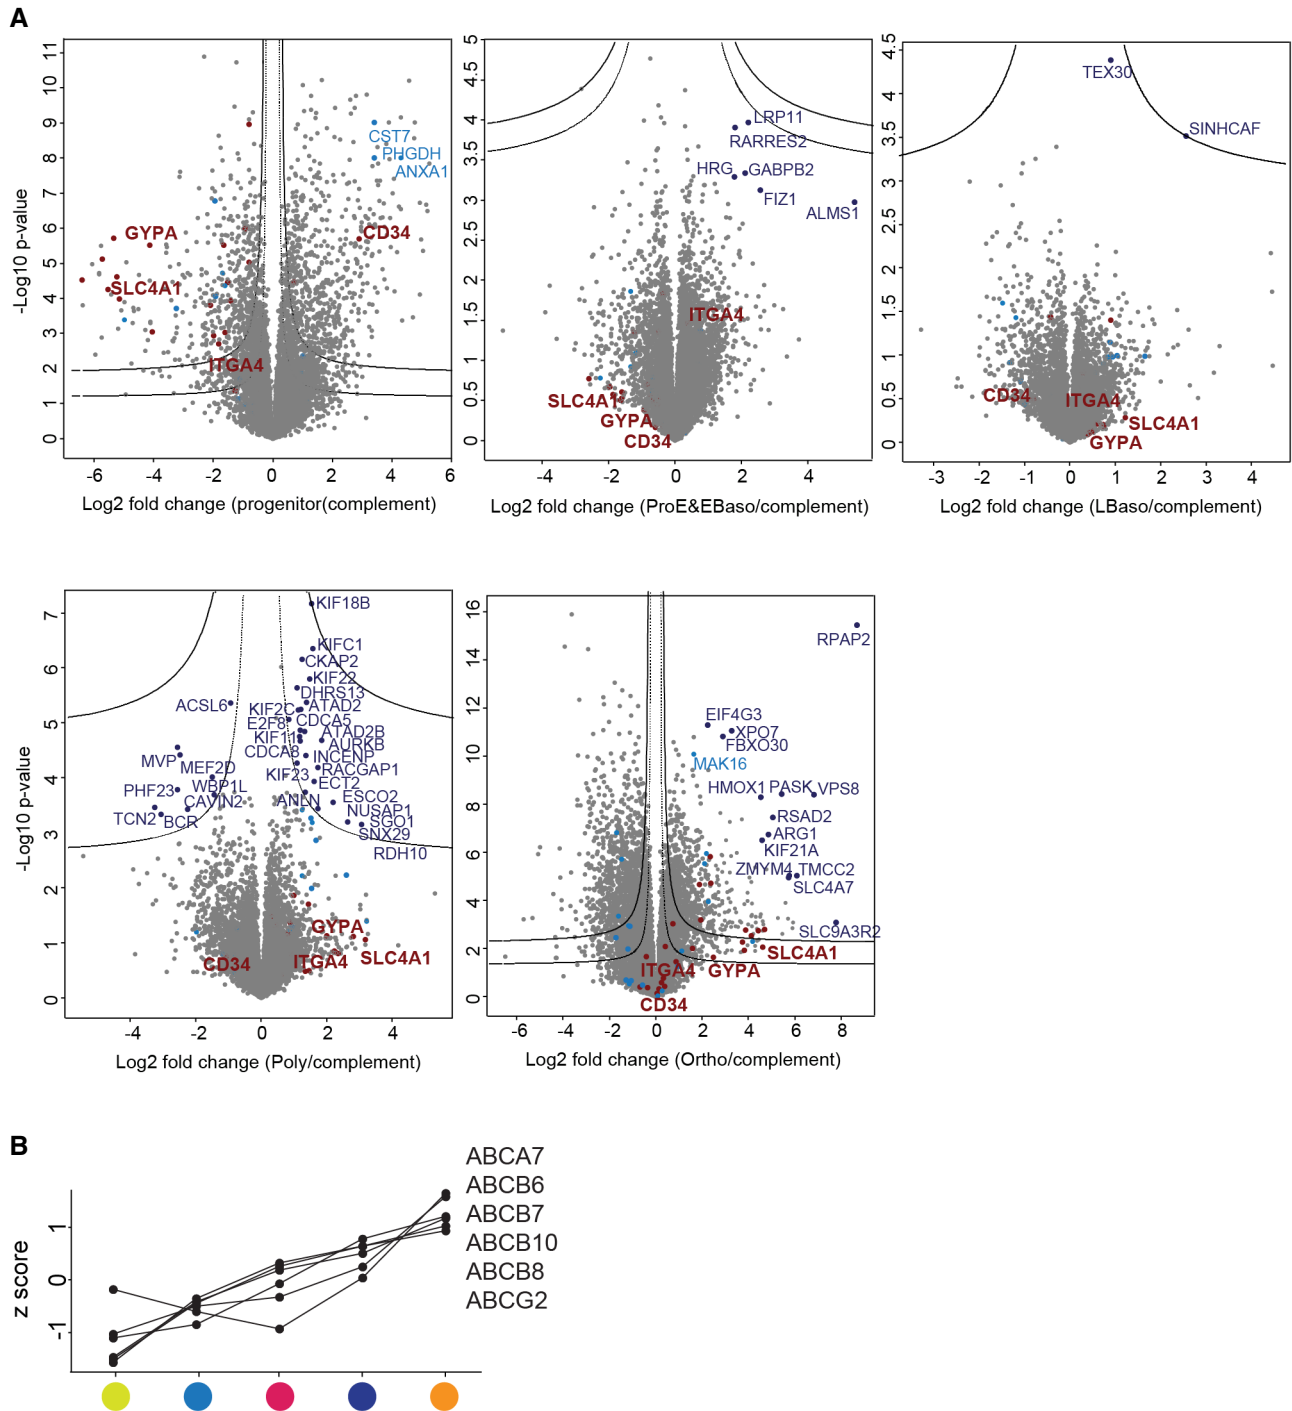

**Figure EV4. Stage-specific significantly regulated proteins.**

A, B Hawaii plots that overlay all volcano plots of protein enrichments in a specific stage over all other stages plotted against corresponding *P*-values. Two cutoff lines were placed graphically, defining two confidence classes with FDRs of 0.01 and 0.05 ( $S_0 = 0.1$ ). Sorting and cluster markers, and selected outliers are labeled in dark red, light blue, and dark blue, respectively.

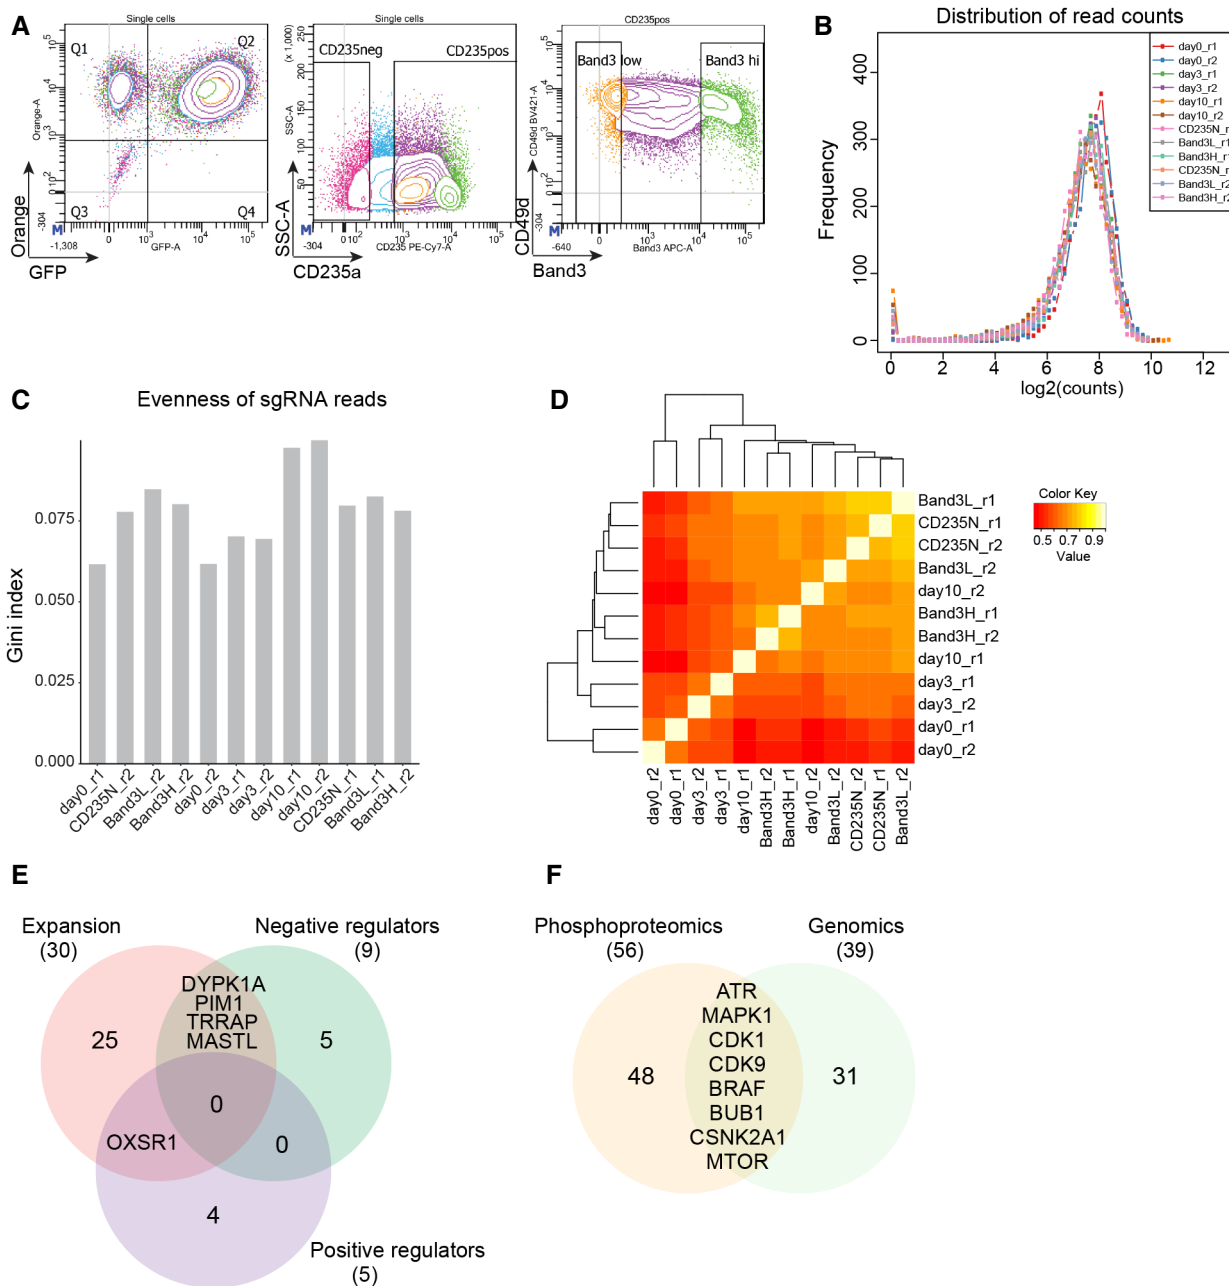

**Figure EV5. Establishing kinome-targeting CRISPR/Cas9 screen in HUDEP-2 cells.**

**A** Flow cytometry strategy based on GFP, CD235a, CD49d, and Band3 to determine the significant hits from the genome-scale CRISPR-Cas9 screen.

**B** Histogram of the sgRNA distribution in each sample in the CRISPR-Cas9 kinase screen.

**C** Evenness of the sgRNA reads in each sample in the CRISPR-Cas9 kinase screen.

**D** Correlation based reproducibility analysis between replicates in the CRISPR-Cas9 kinase screen. High and low correlation values are denoted in yellow and orange, respectively.

**E** Overlap between expansion hits and positive or negative maturation regulators.

**F** Overlap of kinases whose activities were inferred by stage-specific substrate profiling from phosphoproteomics in Figure 4F and the genomic CRISPR-Cas9 kinase screen.

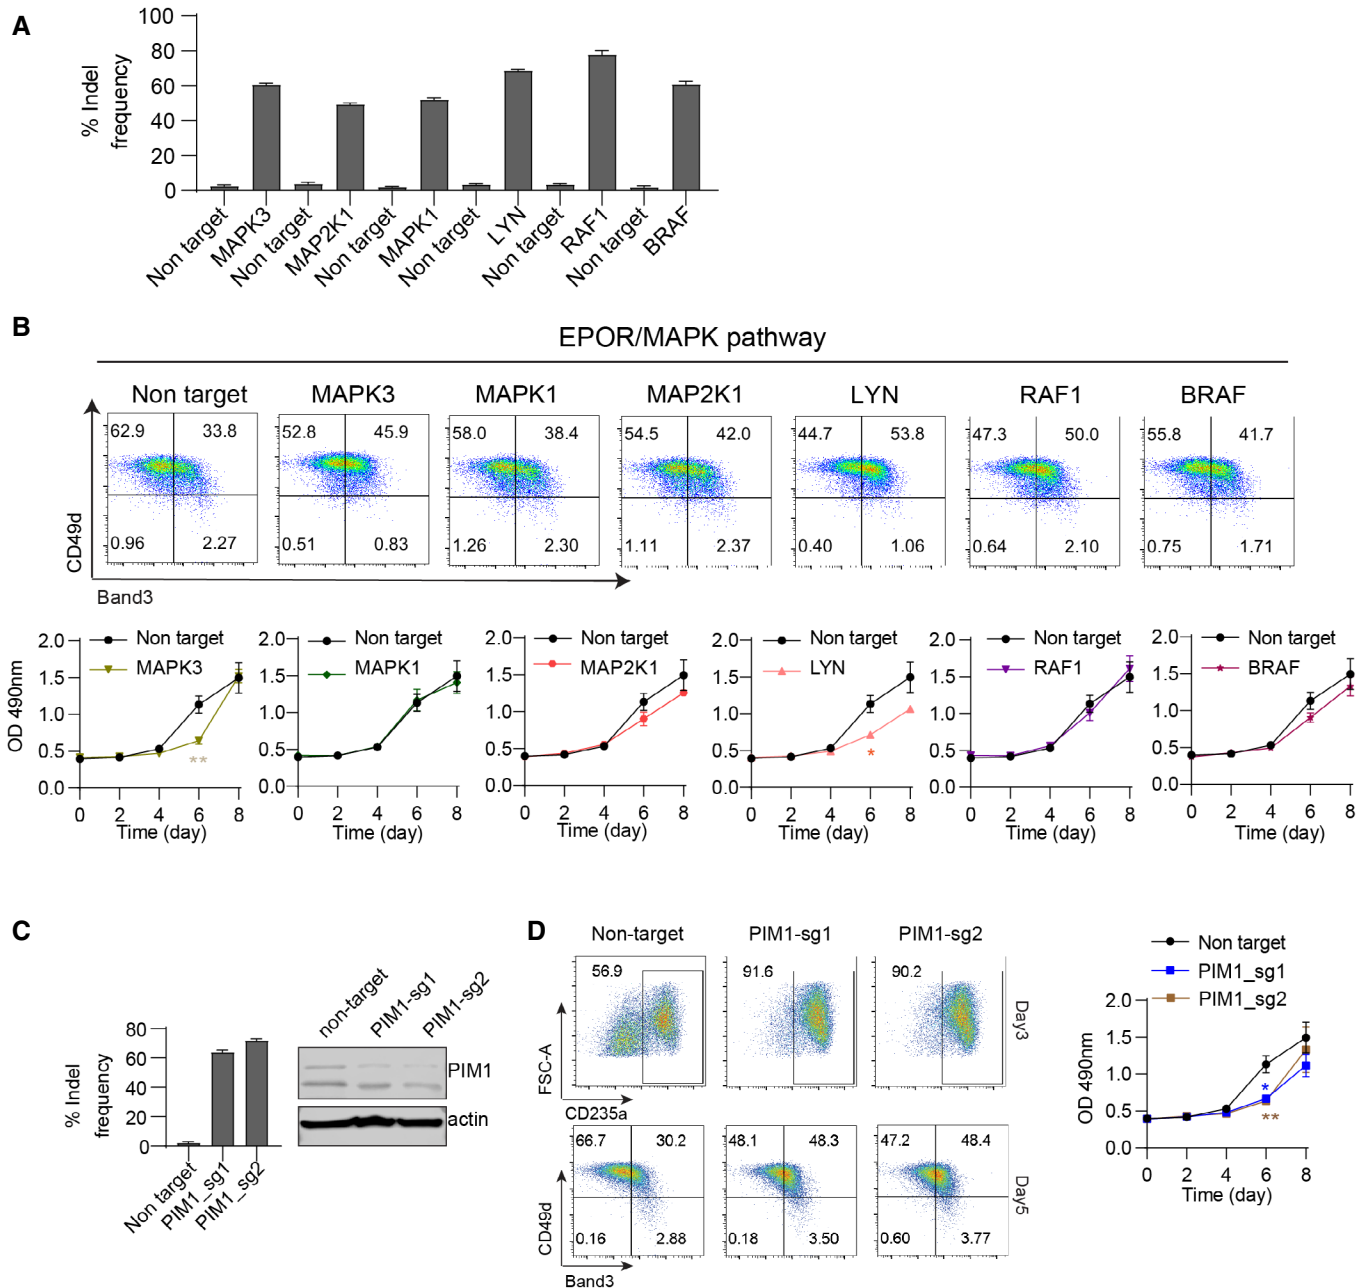

**Figure EV6. Validation of candidate kinases.**

A Indel frequencies at 3 days after transduction of Cas9-expressing HUDEP2 cells with lentiviral vector encoding individual sgRNAs targeting the indicated genes.

B Top panels show FACS analysis of Band3 and CD49d expression in HUDEP2 cells after Cas9 + sgRNA disruption of the indicated genes followed by culture for 3 days in differentiation medium to induce terminal erythroid maturation. The bottom panels show cell numbers measured by a colorimetric CellTiter Glo assay of gene-targeted cells grown in expansion medium, with the light absorbance (OD 490nm) readout shown on the y-axis. Data show the results as the mean ± SEM for three biological replicate experiments. \**P* < 0.05; unpaired t-test.

C Cas9-expressing HUDEP-2 cells were transduced with lentiviral vector expressing PIM1-targeting or control non-targeting sgRNAs and cultured for 3 days. Left panel shows indel frequencies determined by PCR followed by next-generation sequencing. Right panel shows Western blot analysis of whole cell lysates using β-actin antibody as a loading control.

D Left panels show FACS analysis of Band3 and CD49d expression in HUDEP2 cells after Cas9 + sgRNA disruption of *PIM1* followed by culture for 3 days in differentiation medium to induce terminal erythroid maturation. The right panels show viable cell numbers measured by a colorimetric CellTiter Glo assay of gene-targeted cells grown in expansion medium, with the light absorbance (OD 490nm) readout being shown on the y-axis. Data show the results as the mean ± SEM for three biological replicate experiments. \**P* < 0.05, \*\**P* < 0.01; unpaired t-test.
